# Supplementary material for: Characterization and Bioactive Potential of Carotenoid Lutein from Gordonia rubripertncta GH-1 Isolated from Traditional Pixian Douban
Source: MDPI journal article supplement (doi:10.3390/foods11223649), 2022-11-15
Supplement: s1 [file s1]

**Table S1.** Elution procedure for high resolution mass spectrometry.

| Time (min) | Flow rate (mL/min) | Solvent A | Solvent B |
|------------|--------------------|-----------|-----------|
| 0          | 0.1                | 5         | 95        |
| 1          | 0.1                | 5         | 95        |
| 4          | 0.1                | 80        | 20        |
| 11.38      | 0.1                | 100       | 0         |
| 15         | 0.1                | 100       | 0         |
| 18         | 0.1                | 5         | 95        |
| 20         | 0.1                | 5         | 95        |

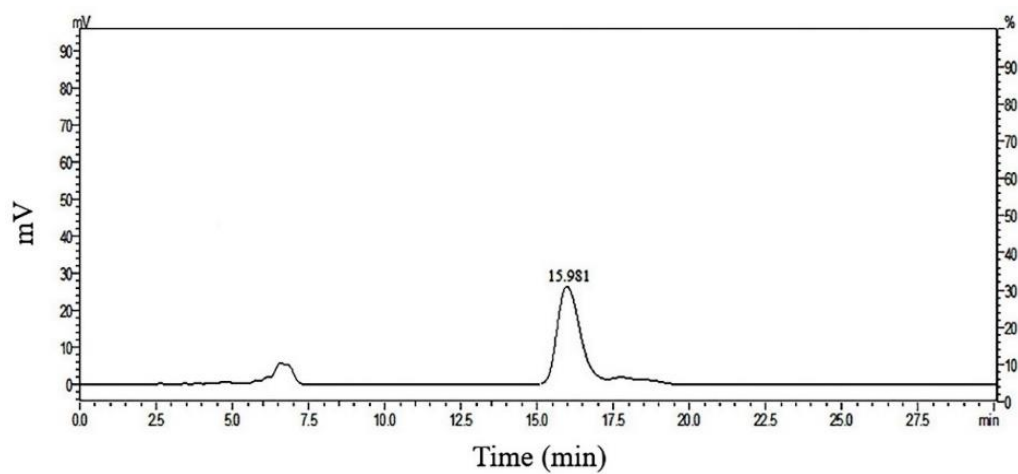

**Figure S1.** HPLC chromatogram of the purified pigment from silica gel column chromatography.
